# Supplementary material
Source: PubMed Central journal article supplement (PMC3399921)
Supplement: NIHMS385778-supplement-1_si_001.pdf [file NIHMS385778-supplement-1_si_001.pdf]

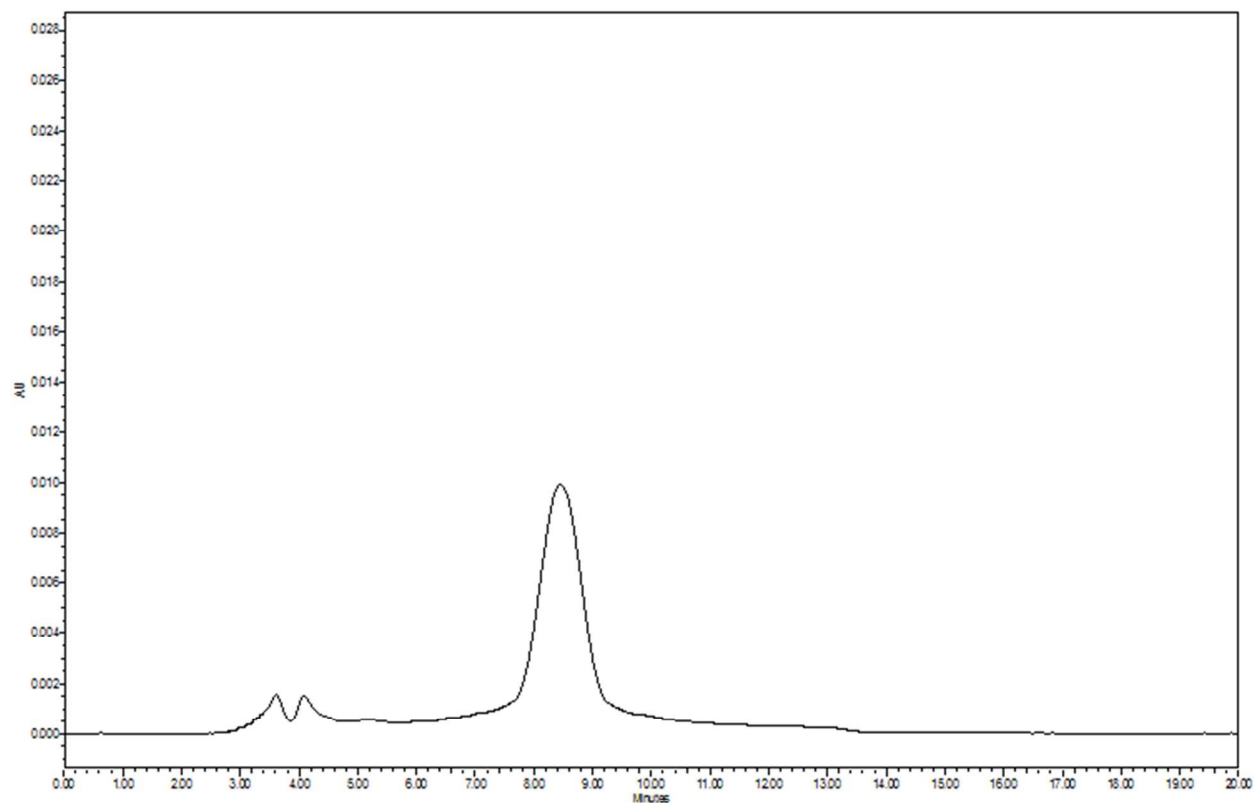

| Peak | Migration Time | Area   | % Area | Height |
|------|----------------|--------|--------|--------|
| 1    | 3.614          | 18750  | 3.05   | 1176   |
| 2    | 4.088          | 14191  | 2.31   | 911    |
| 3    | 8.454          | 581040 | 94.63  | 9433   |

Purity = 94.63 %

1. Column: Hibal®250-4 HPLC Column, Lichrospher® 100 RP-18(5 µm )
2. Solvent: 95% Methanol: 5% H<sub>2</sub>O (Contain 10 mM H<sub>3</sub>PO<sub>4</sub>).
3. Wavelength: 254 nm
4. Flow: 1 mL/min
5. HPLC System: Waters 600-717-486 System
6. Software: Empower 2 TM.

**Figure S1.** HPLC trace of PEG<sub>3.5K</sub>-EB<sub>2</sub>

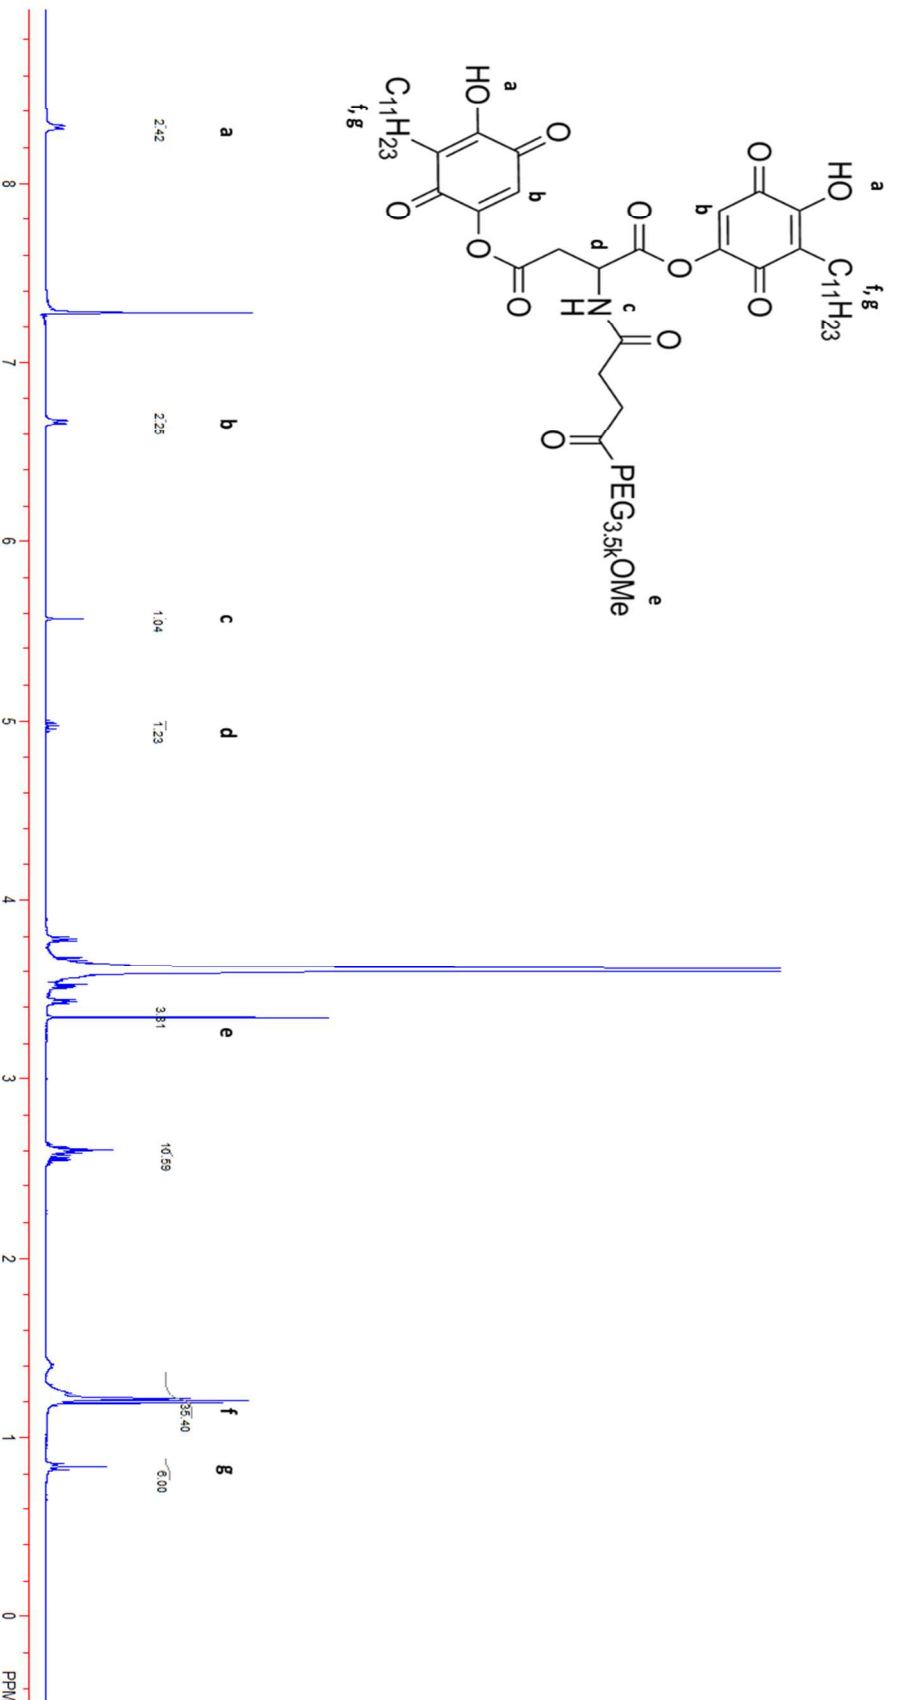

**Figure S2.** <sup>1</sup>H NMR spectra (400MHz) of PEG<sub>3.5K</sub>-EB<sub>2</sub> in CDCl<sub>3</sub>

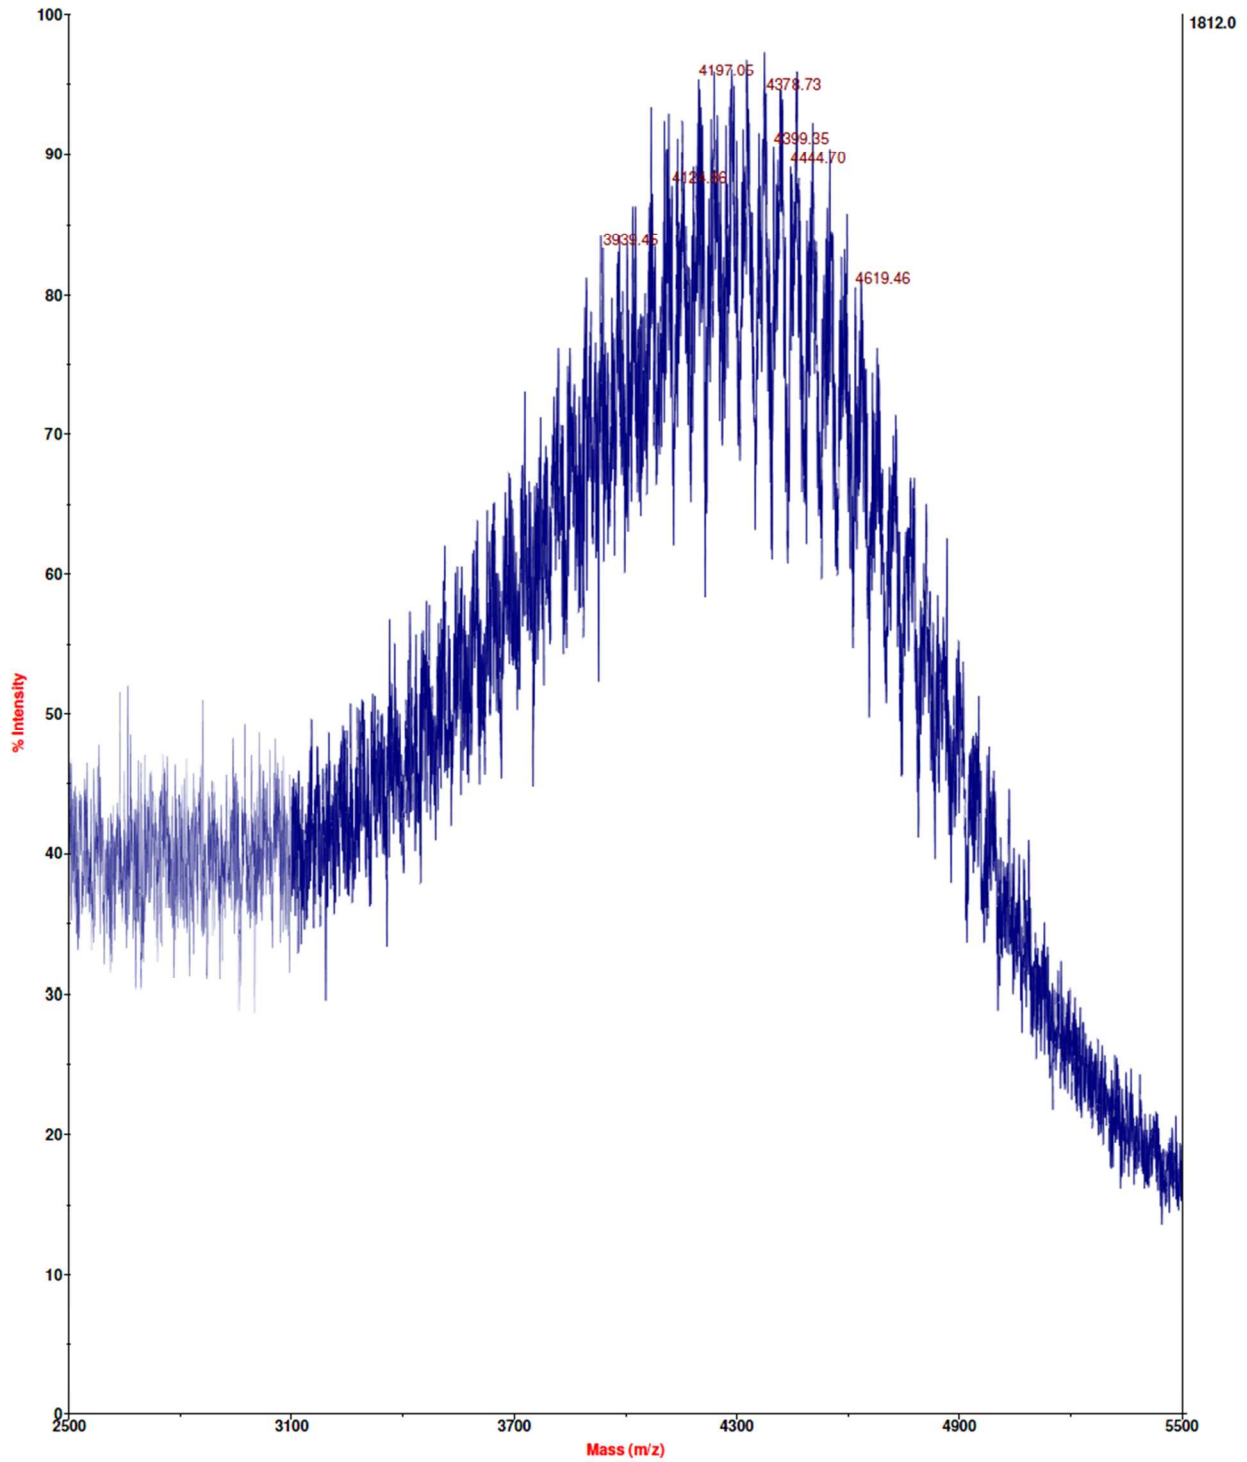

**Figure S3.** MALDI-TOF of PEG<sub>3.5K</sub>-EB<sub>2</sub>

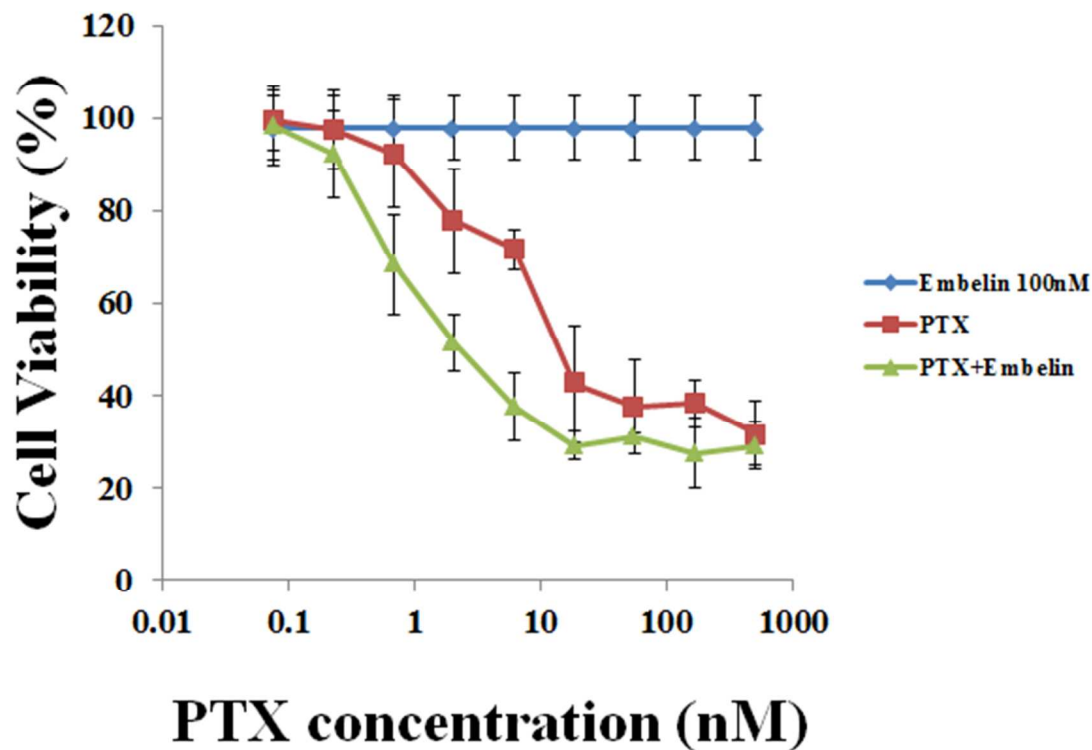

**Figure S4.** Cytotoxicity of embelin, PTX and the combination of embelin and PTX against prostate cancer cells DU145. Cells were treated with various agents for 48h and cytotoxicity was determined by MTT assay.
